**Title:**

Classifications of Logically Coherent Concurrent Diagnoses According to ICHD3: A Pilot  
Application of Automated Diagnosis Through Prime Representation

**Authors:** Pengfei Zhang<sup>1</sup>

**Affiliations:**

<sup>1</sup>Department of Neurology, Rutgers Robert Wood Johnson Medical School, New  
Brunswick, New Jersey, United States.

**Corresponding Author:** Pengfei Zhang, Department of Neurology, Robert Wood Johnson  
University Hospital - New Brunswick, New Jersey, United States. E-mail:  
[pz124@rwjms.rutgers.edu](mailto:pz124@rwjms.rutgers.edu)

## **Abstract**

### **Introduction:**

In clinical practice, headache presentations may fit more than one ICHD3 diagnoses. This project seeks to exhaustively list all these logically consistent "codiagnoses" according to ICHD3 criteria. We limit our project to cases where only two diagnoses are involved.

### **Methods:**

We included the ICHD3 criterias for "Migraine" (1.1, 1.2, 1.3), "Tension-type headache" (2.1, 2.2, 2.3, 2.4), "Trigeminal autonomic cephalalgias" (3.1, 3.2, 3.3, 3.4, 3.5), as well as all "Other primary headache disorders". We excluded "Complications of migraine"(1.5) and "Episodic syndrome that may be associated with migraine" (1.6) since these diagnoses require codiagnoses of migraine as first assumption. We also excluded "probable" diagnosis criteria.

Each phenotype in the above criteria is assigned an unique prime number. We then encoded each ICHD3 criteria into integers, call "criteria representations", through multiplication in a list format. "Codiagnoses representations" are generated by multiplying all possible pairings of criteria representations.

To eliminate logical inconsistent codiagnoses, we manually encode a list of logically inconsistent phenotypes through multiplication: For example, headache lasting "seconds" would be logically inconsistent with "headache lasting hours"; the prime representation for both are multiplied together. We called this list the "inconsistency representations".

All codiagnoses representation divisible by any inconsistency representations are filtered out, generating a list of codiagnoses representation that are logically consistent. This list is then translated back into ICHD3 diagnoses.

### **Results:**

A total of 103 prime numbers were used to encode phenotypes from the included ICHD3 criteria diagnosis with 578 encodings generated. We generated 99 pairs of illogical phenotypes. Once illogical phenotypes were excluded, a total of 253,842 composite numbers representing unique dual-diagnosis clinical profiles were obtained. The number of profiles, although unique, yields duplicate dual diagnoses; once these duplicates are removed, we obtained 145 possible logical dual diagnoses.

Of the dual diagnoses, 2 contains with intersecting phenotypes due to subset relationships, 14 dual diagnoses with intersecting phenotype without subset relationships, 129 contains dual diagnoses as a result of non-intersecting phenotypes.

## **Conclusion:**

Prime number representations of primary headache disorders not only offer clinicians with an automated way of diagnosing headaches but also provides a powerful method of investigating co-diagnosis in headache classifications. Applications of this method to the investigations of dual diagnosis and headaches may offer insight into “loopholes” in the ICHD3 as well as potential explanation for sources of a number of controversies in headache disorders. Futures applications of the method includes extending the methodology to all of ICHD3.

**Key Words:**

Headache classification, automated diagnosis, number theory in medicine

## **Glossary**

NDPH – New Daily Persistent Headache

ICHD3 – International Classification of Headache Disorders, 3<sup>rd</sup> Edition

## **Introduction:**

In clinical practice, patient's headache profiles may satisfy more than one ICHD3 criteria. These "co-diagnoses" can be a source of diagnostic challenges. Consider the cases where headache differential diagnosis lie between cluster headache and paroxysmal hemicrania when indomethacin trial cannot be attempted. In these cases the management maybe quite challenging.<sup>1,2</sup> A similar diagnostic dilemma exists between cluster headache and migraine with aura: Should we consider cluster headaches patients who exhibits aura symptoms a special subtype of cluster headache? Perhaps special subtype of migraine with aura? Or do these cases necessarily imply the co-existence of two separate headache disorders? (See de Coo et al and Silberstein et al versus et al. Peng et al )<sup>3-7</sup> Finally, consider cases of identifiable date of onset of intractable headache without light or sound sensitivity: Should we consider these new daily persistent headaches or chronic tension type headaches? (Lobo et al vs. Robbins et al.)<sup>8,9</sup> The reader may have ready answer for each of the scenarios above; however, one has to agree that those opinions are not likely shared among our colleagues. It is not the goal of this paper is not to weigh in on each of these issues, but rather to identify the conditions of possibilities of their existence which arises as a result of our current classification system.

We can formulate these dilemma as the following: In the ICHD3 criteria, what are the headache disorders that can be logically diagnosed together? Or equivalently: Which headache presentations require more than one ICHD3 diagnoses to fully account for the clinical description? These sorts of questions can be properly called the “co-diagnosis” problems. (When co-diagnosis is restricted to two diagnoses, we use the term “dual diagnosis”.) The answer to the co-diagnosis problem is fundamental to headache classification as a scientific endeavor – it forces us to examine the limitation of our classification project and asks when the current paradigm is unable to assign unique diseases with unique diagnosis.

We propose that the solution to the co-diagnosis problem as linked to a novel technique of automated diagnosis through prime number representation: By encoding headaches phenotypes as prime numbers, and therefore diagnostic criteria as composite numbers, one can automate diagnosis of headache disorders through modular arithmetic. (This method was first presented at American Headache Society’s 2022 Denver Scientific Meeting.<sup>10</sup>) In this project we demonstrate that by encoding ICHD3 as numerical data it is possible to enumerate all possible dual diagnosis for primary headache disorders in ICHD3.

## **Methods:**

There are two phases to this study. Since our technique is novel, the first phase will provide an intuitive description and rationale of our methods. Phase 2 then present an implementation for calculating ICHD3 dual diagnoses of primary headache disorders. Finally we analyses the result based on a paradigm of “intersecting phenotypes” outlined below.

### **Phase 1: Automated Diagnosis Method’s Theoretical Construction**

We will first demonstrate that any ICHD3 criteria can be readily translated into numerical data through prime number representations. Let us consider as an example the migraine criteria taken from ICHD3 below. (The demonstration here is an adaptation of a more formal mathematical treatment that is available as a preprint.<sup>11</sup>) We have excerpted the formal mathematical description as well as proof in the supplementary section to this paper. *(Not available in this preprint. Please refer to citation 11.)*

ICHD3 Criteria for Migraine without aura:

- A. At least five attacks fulfilling criteria B–D
- B. Headache attacks lasting 4–72 hours (when untreated or unsuccessfully treated)
- C. Headache has at least two of the following four characteristics:

1. unilateral location
2. pulsating quality
3. moderate or severe pain intensity
4. aggravation by or causing avoidance of routine physical activity (e.g. walking or climbing stairs)

D. During headache at least one of the following:

1. nausea and/or vomiting
2. photophobia and phonophobia

E. Not better accounted for by another ICHD-3d diagnosis

Since all criteria are logical statements in disguise, one can translate the above into the following propositional logic statement: (We use the alphanumeric designation of the criteria as short-hand for each phenotype.)

$$A \wedge B \wedge [(C1 \wedge C2) \vee (C1 \wedge C3) \vee (C1 \wedge C4) \vee (C2 \wedge C3) \vee (C2 \wedge C4) \vee (C3 \wedge C4)] \wedge (D1 \vee D2) \wedge E$$

Now any logical statement can be translated into its disjunctive normal the form. (The disjunctive normative is simply a series of logic AND statements which are connected by OR.)<sup>23</sup> Therefore one can translate the above into the following equivalent logical statement:

$$(A \wedge B \wedge C1 \wedge C2 \wedge D1 \wedge E) \vee (A \wedge B \wedge C1 \wedge C2 \wedge D2 \wedge E) \\ \vee (A \wedge B \wedge C1 \wedge C3 \wedge D1 \wedge E) ..$$

Given criteria in disjunctive normal form, we propose the following algorithm:

Step 1: Each phenotype in the ICHD3 is assigned a unique prime number. (Table 1)

Negations crucial to diagnostic criteria are also assigned a prime number.

Step 2: If AND is used between two phenotypes, then the corresponding prime number for those two phenotypes are multiplied together. These are called encodings.

Step 3: All encodings that are separated by OR in the disjunctive normative form are then combined in a list.

Step 4: We do not encode the ubiquitous criteria “Not better accounted for by another ICHD-3d diagnosis”, given that it is recursively referring to the totality of ICHD3 encodings, creating a logical impasse.

For example, in migraine without aura the first conjunction in the distinctive normative form, when excluding criteria E, is  $(A \wedge B \wedge C1 \wedge C2 \wedge D1)$ . This is therefore encoding as:

$$157*23*523*421*281 = 223417708453$$

Repeating this procedure for totality of migraine without aura yields:

[7580756461,13242732241,16451185183,102951563551,127894697713,223417708453,3191498470081,3964735629103,4166259653173,6925948962043,7277988854713,9041302068919,53843667737173,56580493999543,70288832213209,122786715194029,1669153699852363,1753995313985833,2178953798609479,3806388171014899,29591598361760989,917339549214590659]

Now a patient's headache profile, thought of as a collection of headache phenotypes, can be expressed using only logic conjunction. Therefore, a patient profile can be expressed as one composite integer. For example, a patient who has the phenotype of five headaches, each lasting 4 to 72 hours, unilateral, pulsating, with nausea, and photophobia can be represented as  $157*23*523*421*281*397 = 88696830255841$ .

We now observe that a patient profile, represented as a composite number, must divide without remainder at least one number in its corresponding diagnosis' encoding, assuming that a diagnosis exists. This observation forms the basis for automated diagnosis. For

example, a patient profile having migraine without aura (such as 88696830255841 above) must have an encoding which divide by at least one number in the migraine without aura encodings (in this case, 223417708453) without remainder.

How this method works can be understood intuitively: Consider a patient profile satisfying migraine diagnosis. Then this patient's profile, when translated into propositional logic, must satisfy one of the many conjunctions in migraine criteria's disjunctive normative forms. (Since that is the implication of OR operator.) Encoding both the patients profile and the conjunction that it satisfies using our algorithm implies that both must share at minimum a collection of prime numbers. Since both sets of prime numbers are "bundled" together by multiplication in our algorithm, one of the two encodings must divide the other without remainder. The bigger of the two encoding must be the patient profile, since it has more "variable" to encode than those in the criteria. Therefore the patient encoding must be divisible by the encoding of one of the conjunction in the disjunctive normal form. We use prime number as building block for encoding since they have the property of not being able to divide by each other.

A caveat: although theoretically possible, in practice logical conflicts cannot exist within a patient's clinical profile unless there exists more than one headache diagnosis - for

example, it makes no sense to be both photophobic and not photophobic at the same time in either the criteria or user encoding.

Armed with the prime number automated diagnosis above, we can now tackle the uniqueness problem as follows: To obtain all possible combinations of dual diagnoses, we multiply all encodings of each ICHD3 diagnosis by those from another. This list, let's call it M, represents patient profiles which satisfies two ICHD3 diagnoses concurrently. Now not every pairing of two ICHD3 encodings is possible as some of these pairing would contain phenotypes that are contradictory. This contradiction is manifested by the co-occurrence of two logically contradictory phenotypes in the same patient profile - if A and B are logically contradictory phenotypes, then its encoding is simply the prime representation of A multiplied by the prime representation of B. Therefore to obtain a non contradictory listing of duo diagnosis, we simply eliminate from the list M those that are divisible by  $A*B$ .

## **Phase 2: Implementation of Automated Diagnosis for the Purpose of Extracting Dual Diagnoses:**

Due to the limitations in computational power, we only included ICHD3 primary diagnosis up to two layers deep in terms of ICHD3 classification. That is, ICHD3 criterias for "Migraine" (1.1, 1.2, 1.3), "Tension-type headache" (2.1, 2.2, 2.3, 2.4), "Trigeminal

autonomic cephalalgias" (3.1, 3.2, 3.3, 3.4, 3.5), as well as all "Other primary headache disorders" are included in this study. We excluded "Complications of migraine"(1.5) and "Episodic syndrome that may be associated with migraine" (1.6) since these diagnoses require diagnoses of migraine as first assumption. We also excluded "probable" diagnosis criteria.

We then encoded all included criteria above into their numerical encodings. (Table 2) All possible take-two combinations encodings in Table 2 are multiplied together. We call this list M' which represents the list M that was described in the last section.

We further generate, by hand, a list of mutually logically exclusive phenotypes (Table 3). This list in table 3 are then encoded as a list of composite numbers. We call this list L'.

Any number in list M' that is divisible by any number in list L' are then excluded. The resulting list are therefore the totality of all possible patient clinical profiles with dual diagnosis that contains non-contradictory criteria. We then diagnosed these clinical profiles using the automated diagnosis technique discussed above. Since there are multiple duplicates when it comes to which dual diagnosis are possible; eliminating the duplicates generates the results presented in table 4.

The above are implemented through custom codes written by the author in Haskell and are available for review upon inquiry.

### **Analysis of results as “intersecting” vs “non-intersecting” phenotypes:**

We will now introduce a paradigm to interpret the results through the concept of “intersecting phenotypes”: Let us define a dual diagnosis pair as having “intersecting phenotype” if there exists at least one phenotype shared between the two diagnoses. If this does not exist then we describe the pair as having “non-intersecting phenotype”. (Non-intersecting phenotypes are “less interesting” in the sense that it is always possible to obtain dual diagnosis whose phenotypes are non-intersecting. We previously put forth this notion in a preprint.<sup>12</sup>) For example, primary stabbing headaches and SUNCT is a dual diagnoses pair with intersecting phenotype given that both contains duration measured in seconds. On the contrary, cold induce headache and nummular headaches is a dual diagnoses pair with non-intersecting phenotype as the phenotypes in their criteria do not overlap.

We can now classify our results as the following: first we separate those with intersecting phenotypes from those with non-intersecting phenotypes. We further differentiate those with intersecting phenotype due to a subset relationship versus those with intersecting phenotype without a subset relationship. For example, chronic migraine is a subset of migraine without aura since chronic migraine is defined as the existence of migraine

without aura or migraine with aura greater than 15 days per month. This would be an example of an intersecting phenotype which contains a subset relationship.

### **Results:**

A total of 103 prime numbers were used to encode phenotypes from the included ICHD3 criteria diagnosis. (Table 1) A total of 578 encodings were generated. (Table 2) A total of 99 pairs of illogical phenotypes were found. (Table 3) Once illogical phenotypes were excluded, a total of 253,842 composite numbers representing unique dual-diagnosis clinical profiles were obtained. A number of profiles, although unique, yield duplicate dual diagnoses; once these duplicates are removed, we obtained 145 possible logical dual diagnoses. (Table 4)

Using our classification schema above, we obtained the following: 2 dual diagnoses with intersecting phenotypes due to subset relationships, 14 dual diagnoses with intersecting phenotype without subset relationships. The remaining 129 dual diagnoses are results of non-intersecting phenotypes. This breakdown of results is incorporated in Table 4. The intersecting diagnosis that are subsets of each other contain only two pairs of dual diagnosis: migraine with or without aura and chronic migraine. This is to be expected given that we define chronic migraine through the existence of migraine with aura or migraine without aura.

## **Discussion:**

In clinical practice, patients with two concurrent ICHD3 diagnoses are common: Indeed, when managing secondary headaches with etiology which cannot be treated, it is recommended that one treat the phenotype of the disease; some would even suggest that secondary headaches may be triggers of underlying primary headaches and therefore should be treated according to the primary headache it provokes.<sup>13</sup> This is also the preferred method for treatment of post traumatic headaches.<sup>14</sup> Therefore, secondary headaches with a primary headache phenotype are a rather non-controversial manifestation of the dual headache diagnosis problem.

Dual diagnosis in primary headaches, however, can be the source of controversies as discussed in our introduction. This stems from the fact the primary headache disorders are phenotypically defined; controversies arise not necessarily from a disagreement in regards to pathophysiology, but rather definition. In other words, the problem is a Kantian one: What are the conditions of possibilities of being diagnosed as a specific kind of primary headache disorders? What are the redundancies in the contemporary classifications of headache disorders? The results presented here may provide some answers. Our discussion will be organized around a few canonical diseases.

### **The migraine/TTH Dilemma:**

While the split between migraine without aura and tension type headaches is an old one, that migraine with aura and tension type headache can be co-diagnosed is not surprising; migraine with aura patients can often have a headache that is not phenotypically like migraine without aura - the exemplary case being migraine with aura without headaches. More peculiar, however, is that it is actually possible to have migraine with aura diagnosed concurrently with chronic tension type headache and chronic migraine. This is due to the “loophole” that migraine with aura and chronic tension type headache can coexist. In this case, if aura occurs greater than 15 days per month, one can obtain these “monster” diagnoses that is the duo of chronic migraine, migraine with aura, chronic tension type headache.

### **Cluster Headaches, TAC, and SUNCT/SUNA:**

Our results also highlight some of the peculiarities of our contemporary classification of TAC. Firstly, it is not surprising to notice that cluster headache can be diagnosed together with hypnic headache. It is also not surprising that cluster headache has a non intersecting phenotypical relationship with migraine with aura . This is, of course, a source of contemporary debate mentioned previously. (Indeed one can make the same argument for any TAC being co-diagnosed with migraine with aura following the same logic.) What is

more surprising is that, following the loophole above, since cluster headache can be diagnosed together with migraine with aura, it is theoretically possible to have a chronic migraine form of cluster headache with migraine with aura: If a patient contains a co-diagnosis of migraine with aura with 15 days of aura and cluster headache, that person satisfies chronic migraine.

Our data also confirms the dilemma between paroxysmal hemicranias and cluster headaches in clinical diagnosis. Fortunately, an indomethacin trial can often be used to differentiate the two.<sup>15</sup> Nevertheless, a co-diagnosis between cluster headache and paroxysmal hemicranias is possible as cluster headache is not defined as unresponsive to an indomethacin trial.

Short lasting unilateral neuralgia form headaches can be co-diagnosed with sex headache and primary stabbing headache. This is due to the fact that all of these headache types are short lasting in nature, and raises the theoretical possibility, of subtypes of short lasting unilateral neuralgia form headaches to be further classified by their provoking phenotypes.

### **New Daily Persistent Headaches and Status Migrainosus**

New daily persistent headache can be logically diagnosed with chronic tension type headache; empirically multiple researches in new daily persistent headache separate

migraine versus tension type headaches phenotype in NDPH.<sup>9</sup> However, according to the IC HD3 definition, it is actually impossible to diagnose new daily persistent headache concurrently with either migraine with or without aura. This is both due to 1) a limitation of the current study of not including status migrainosus and 2) from an artifact of the classification guideline which suggests that migraine, both migraine without aura as well as migraine with aura, must not be constant - migraine without aura is limited to 72 hour duration according to the guideline and migraine with aura also is limited by the fact that the migraine aura must be reversible. It is only the concept of status migrainosus which allows one to bridge this gap and therefore the possibility of migrainous NDPH.

The concurrent diagnosis of new daily persistent headache with hemicranias continua, nummular headache, or thunder clap headache essentially describes the subclassification of new daily persistent headache that was presented by Rosen in a prior review article.<sup>16</sup> For instance, the lock sided headache nature of some new daily persistent headache may be attributed to a cervicogenic cause, of which nummular headache, being lock sided in nature, can be another manifestation. That new daily persistent headache can be concurrently diagnosed with thunderclap headache simply shows us that there is a subtype of new daily persistent headache which could be a persistent form of RCVS, as proposed by Rosen.<sup>16,17</sup>

### **Non-intersecting phenotypes**

Non-intersecting phenotypes represents the majority of dual diagnoses. This leads to the question of headache trigger in primary headache disorders. For example, it is possible to co-diagnose migraine without aura with cold induced headaches, compression headache, or exercise headache. It is also well documented that migraine can be triggered by cold (temperature), compression, or exercise.<sup>18-21</sup> In the setting of these co-diagnosis then, is a dual diagnosis of migraine without aura with cold inducing headaches simply migraine without aura that's being triggered by a cold weather? (Of note, it is actually hot rather than cold weather that triggers headaches more in Tanik's study; this brings up the question of a theoretical possibility of "hot induced headaches".) The same statement can be made regarding compression or exercise induced headaches.

While this may appear to be a trivial observation, its existence is an exploitation of a loophole in our current classification suggests to us that perhaps we ought to consider cold, exercise, compression as migraine subtypes when they co-exist with migraine or any other primary headache disorders. This notion is similar to Schankin's suggestion that secondary headaches with primary headache diagnoses should be classified as such.

## **Limitations**

Despite our attempt to rule out obvious logical contradictions in the methods, this is not a fool-proof method. For example concurrent diagnosis of cold induced headache with hypnic headache is on paper logically consistent but in practice impossible - it would be unlikely for somebody to wake up at night from a hypnic headache while triggering that same headache through a cold stimuli. However, these sorts of occurrences in the data appears to be rare. The only other two instances following a similar argument for compression headache and hypnic headache pairing as well as the primary cough headache and hypnic headache pairing.

Finally, status migrainosus is considered a “complication of migraine” in the ICHD3 and therefore excluded based on our inclusion criteria. This proves to be an important omission as it limits the duration of migraine attacks. That status migrainosus’ complicated relationship to intractable headaches is not lost for those conducting research in status migrainosus.<sup>22</sup> As such, although our omission causes the study to be incomplete, but shows us the importance of a rethinking of duration in migraine definitions.

## **Conclusions**

Prime number encoding of ICHD3 allows for an exhaustive study of the structure of contemporary headache diagnoses. In our pilot study of this approach, these important results are obtained: 1) Triggers may be used to delineate migraine subtypes. 2) Status

migrainosus is required for modeling migraine intractability in our classification. 3) The possibility of dual diagnosis of chronic migraine and migraine with aura allows for loopholes in diagnoses which enable the construction of “monsters” in headache diagnoses such as co-diagnoses of chronic migraine, chronic tension type headaches, migraine with aura. This maybe undesirable in our classification.

**Article highlights:**

- Prime number representations of headache phenotypes allows for automated diagnosis based on ICHD3 criteria.
- Dual diagnoses can be classified and evaluated using the automated diagnosis methods above.

### **Declaration of Interests:**

PZ has received honorarium from Lundbeck Biopharmaceuticals, Board Vitals, and Fieve Clinical Research. He collaborates with Headache Science Incorporated without receiving financial support. He has ownership interest in Cymbeline LLC.

### **Study Funding**

N/A.

### **Acknowledgements**

N/A.

## References:

1. Shah ND, Prakash S, Coexistence of cluster headache and paroxysmal hemicrania: does it exist? A case report and literature review. *J Headache Pain*.2009;10:219-23.
2. Tehindrazanarivelo AD, Visy AD, Visy JM, Bousser JM, Ipsilateral cluster headache and chronic paroxysmal hemicrania: two case reports. *Cephalalgia*.1992;12:318-20.
3. Rozen TD, Cluster headache with aura. *Curr Pain Headache Rep*.2011;15:98-100.
4. de Coo IF, Wilbrink IF, Ie LA, Haan GD, Ferrari MD. Aura in Cluster Headache: A Cross-Sectional Study. *Headache*.2018;58:1203-1210.
5. Silberstein SD, Niknam R, Niknam R, Rozen R, Young TD, WB. Cluster headache with aura. *Neurology*.2000;54:219-21.
6. Applebee AM, Shapiro RE. Cluster-migraine: does it exist? *Curr Pain Headache Rep*.2007;11:154-7.
7. Peng KP, Schellong M, May A. Aura in trigeminal autonomic cephalalgia is probably mediated by comorbid migraine with aura. *Cephalalgia*.2022;42:31-36.
8. Lobo R, Wang M, Lobo S, Bahra A. Time to retire 'New daily persistent headache': Mode of onset of chronic migraine and tension-type headache. *Cephalalgia*.2022;42:385-395.

9. Robbins MS, Grosberg BM, Napchan U, Crystal SC, Lipton RB. Clinical and prognostic subforms of new daily-persistent headache. *Neurology*.2010;74:1358-64.
10. Zhang P. No machine learning required: A number theory diagnostic methods for primary headache disorders. American Headache Society 64th Annual Scientific Meeting June 9-12, 2022 Denver, Colorado. *Headache*.2022;62:911-929.
11. Zhang P. Disease Diagnosis and Classification as Prime Number Representations. hal-03723482
12. Zhang P. A Mathematical Interpretation of International Classification of Headache Disorders 3rd Edition. <https://osf.io/fqr64>
13. Schankin CJ, Straube A. Secondary headaches: secondary or still primary? *J Headache Pain*.2012;13:263-70.
14. Ashina H, Eigenbrodt AK, Seifert T, Sinclair T, Scher AI, Schytz HW, Lee MJ, De Icco R, Finkel AG, Ashina M. Post-traumatic headache attributed to traumatic brain injury: classification, clinical characteristics, and treatment. *Lancet Neurol*.2021;20:460-469.
15. International Headache Society. International Classification of Headache Disorders. *Cephalalgia* Cephalalgia 2018;38:1-211
16. Rozen TD. The Three T's of NDPH (How Clinical Observations Have Led to Improved Treatment Outcomes). *Headache*.2019;59:1401-1406.

17. Jamali SA, Rozen TD. An RCVS Spectrum Disorder? New Daily Persistent Headache Starting as a Single Thunderclap Headache (3 New Cases). *Headache*.2019;59:789-794.
18. Amin FM, Aristeidou S, Baraldi C, Czapinska-Ciepiela EK, Ariadni DD, Di Lenola D, Fenech C, Kampouris K, Karagiorgis G, Braschinsky M, Linde M. The association between migraine and physical exercise. *J Headache Pain*.2018;19:83.
19. Marmura MJ. Triggers, Protectors, and Predictors in Episodic Migraine. *Curr Pain Headache Rep*.2018;22:81.
20. Tanik N, Saçmaci H, Aktürk T. The relationship between exposure to hot/cold weather and the clinical features of headaches in patients with migraine and tension-type headaches. *Neurol Res*.2020;42:239-243.
21. Krymchantowski AV. Headaches due to external compression. *Curr Pain Headache Rep*.2010;14:321-4.
22. Iljazi A, Chua A, Rich-Fiondella R, Veronesi M, Melo-Carrillo A, Ashina S, Burstein R, Grosberg B. Unrecognized challenges of treating status migrainosus: An observational study. *Cephalalgia*.2020;40:818-827.
23. Weisstein, Eric W. "Disjunctive Normal Form." *MathWorld*. Mathworld.Wolfram.com. Accessed August 13, 2022.

### **Tables 1, Sample Prime Number Assignments for Headache Phenotypes:**

- 2,1 minute to 72 hours with severe
- 3,1 to 14 days per month
- 5,1 to 600 seconds
- 7,15 minutes up to four hours after waking
- 11,15 to 180 minutes
- 13,1–6 cm in diameter
- 17,2 to 30 minutes
- 19,30 min to 7 days in duration
- 23,4 to 72 hours
- 29,abrupt explosive intensity just before or with orgasm
- 31,aggravated by physical activity
- 37,at least one aura symptom is positive
- 41,at least one aura symptom is unilateral
- 43,at least one aura symptom spreads gradually over 5 minutes
- 47,between 1 second to 2 hours
- 53,bilateral location
- 59,brainstem aura
- 61,brought on by cold stimuli
- 67,brought on by exercise
- 71,brought on by sex
- 73,brought on within 1 hour of compression
- 79,brought on within 1 hour of traction

83,clearly remembered onset  
89,conjunctival injection  
97,constant  
101,developing only during sleep and causing waking  
103,each individual aura symptom lasts 5–60 minutes  
107,every other day to 8 per day  
109,eyelid edema  
113,fixed in size and shape  
127,forehead and facial sweating  
131,fully reversible  
137,greater than 1 per day  
139,greater than 15 days per month  
149,greater than 2 episodes  
151,greater than 20 episodes  
157,greater than 5 episodes  
163,greater than 5 minutes  
167,greater than 5 per day  
173,greater than 8 days per month  
179,hours to days  
181,increasing in intensity with increasing sexual excitement  
191,indomethacin responsive  
193,irregular frequency  
197,lacrimation

199,less than 12 days per year  
211,less than 48 hours  
223,max within 1 minute  
227,maximal at site of compression  
229,maximal at site of traction  
233,mild to moderate pain  
239,miosis  
241,moderate to severe  
251,more than 1 episode per day  
257,more than 10 episodes  
263,more than 3 months  
269,more than 10 days per month  
271,motor aura  
277,nasal congestion  
281,nausea/vomiting  
283,no conjunctival injection  
293,no eyelid edema  
307,no forehead and facial sweating  
311,no lacrimation  
313,no miosis  
317,no nasal congestion  
331,no nausea/vomiting  
337,no orbital or supraorbital or temporal pain

347,no phonophobia  
349,no photophobia  
353,no ptosis  
359,no restless  
367,no rhinorrhea  
373,nonpulsating  
379,not aggravated by activity  
383,orbital or supraorbital or temporal pain  
389,phonophobia  
397,photophobia  
401,provoke by cough  
409,provoke by valsalva  
419,ptosis  
421,pulsating  
431,relieve by triptan or ergot  
433,resolve within 1 hour after removal of compression  
439,resolve within 1 hour after removal of traction  
443,resolve within 30 min after removal of cold  
449,restless  
457,retinal aura  
461,rhinorrhea  
463,round or elliptical  
467,sensory aura

479,severe

487,sharply contoured

491,single or series of stabs

499,speech and/or language aura

503,sudden

509,the aura is accompanied, or followed within 60 minutes, by headache

521,two or more aura symptoms occur in succession

523,unilateral

541,unremitting within 24 hours

547,up to 72 hours with mild

557,up to few seconds

563,visual aura

**Table 2, Prime number encodings for selected primary headache disorders:**

Migraine without aura:

7580756461,13242732241,16451185183,102951563551,127894697713,223417708453,31  
91498470081,3964735629103,4166259653173,6925948962043,7277988854713,90413020  
68919,53843667737173,56580493999543,70288832213209,122786715194029,166915369  
9852363,1753995313985833,2178953798609479,3806388171014899,2959159836176098  
9,917339549214590659,

New Daily Persistent Headache:

1145520433,

Primary exercise headache:

2106413,

Primary thunderclap headache:

17411171,

Cold-stimulus headache

4026427,

External compression headache:

1069111207,

External traction headache:

1183350401,

Cluster headache:

1577982193416431,1932584933510011,2251727399594233,3492836989921763,4237502  
744118281,4911247950296083,7428927404960501,7960831515100871,81735931591570  
19,

Paroxysmal Hemicrania:

699200435231955421,856324128542507201,997735452522003803,154766837910893503  
3,1877628135061093771,2176163152351142153,3291741374856059791,3527426914821  
887461,3621701130808218529,

Short lasting unilateral neuralgiform headaches:

444401003390335,544266397410635,634145252028905,983674131099955,11933914585  
42585,1383135707181155,2092180004725285,2301897332167915,

Hemicrania continua:

54659995058027,66943140014887,77997970476061,120988977825071,14678358223447  
7,170121557652511,257331886846217,275756604281507,283126491255623,

Migraine with aura:

75121389451,179941932871,188719588133,209121705769,345049093919,581872457273  
,594604896163,635348700611,716836309507,826512945899,866830650577,8892276100  
13,910191718697,932604566599,954591314731,960542072261,1033426681907,1057790  
375783,1393787513933,1424286146623,1461777148759,1493763519629,1521881771231  
,1596119906413,1619807110787,1655251467697,1717073020447,1768673409809,18008  
32679981,1995517294033,2233913264179,2286579195751,2475417400847,25337769466  
43,2596169469181,2657375822089,4084418344297,4180711114693,4283658263531,438  
4648242239,4746756454183,4858664268427,6887746063999,7038462608069,705012907  
5331,7204398858161,7223733676877,7381802247487,7394037810713,7520755549093,7  
555832948803,7698062163217,7887621673439,8004677858161,8073577390691,8179834  
922891,8193393249709,8372679754079,8485341431141,8685388773329,8740337530027  
,8899260525343,8946396568063,9109066274467,9861342744299,10093830196031,1026  
0855840551,10502762068619,11299697190653,11370137553043,11638195805767,11924  
778409289,12205912674341,12521286076129,13132080518867,17303362063217,176819  
91430027,17711299872173,18098855668063,18893605403819,19173995799781,1933903  
4214911,19593558071111,19626034993489,20055488713259,20109312668063,20549341  
391653,20583402554147,20936157339367,21033805235857,21316833351403,214297406  
16523,21819391308607,21957433307141,22475093817329,23621355875879,2417824442  
3051,24773617138117,25357670980273,31455913801007,51901998960457,57513025875  
101,60318539332423,87524773154719,89439976068389,95568625392133,969869107930  
67,99109162670377,101717979612241,103943755971371,105900368677769,1078259240  
39621,111066240320587,119482780692553,125311209019019,144483943052083,243650  
044187461,248981555001191,266042389605127,300164058812999,

Chronic migraine:

47943440512446421,83751819318423001,104043233975143063,651102853410965911,8  
08852238322886393,1412974242049523533,20184188455739943241,2066362286086440  
7451,25074419388009478183,26348930066400847453,36097034126240313431,4380220  
1503535229523,44842633843286660153,46028628871181563393,5718045819389063575  
9,74589881356425382327,178668785574693357667,187384336090532058041,20764210  
2154373361613,280625329820126307641,340526792333935171453,34260776012866573  
9163,348615314717164035383,357835469611443767023,444531949184762684449,5777  
55521692989825821,590397874465265314351,608991898323344642723,6308534033365  
46877647,711764461079110004239,776547512891224440469,820665099843083049623,  
860697543737867588629,882936037451639990801,903751818295293585869,926006088  
059037063523,947837272846283516887,953745926844664084697,102611485433568971  
9039,1050306167208043897091,1383926017078557024641,1414208862091216915771,1

451434603277511025843,1483194660242007984833,1511113966131728567387,1584826  
842528398253601,1608346452280485190799,1643540028916819658869,1704924174212  
751870619,1756159474153089956693,1788091207101178791137,1981398364625630552  
341,2218107606280949245183,2270400909375981447427,2457903023176187001419,25  
15849656335547009311,2577800731623805879537,2638574029815329790253,40555197  
65243973517069,4151131233186856979161,4253349997694899054487,43536254396837  
76831803,4713171619067320573891,4824287649379320273079,68390130358542284033  
23,6988663211693489418713,7000247134931341843087,7153425409218679738997,717  
2623427847117593729,7329573612263903536699,7341722604927992664701,746754377  
4379124667961,7502372990156176311631,7643595886938161005909,783181420239761  
8554203,7948042176803562738997,8016454222886363981807,812195994872486608120  
7,8135422346001289168993,8313440340443330507483,8425304899750395166457,8623  
936842377123539733,8678496818873036776279,8699385224423915536871,8836295382  
665048589211,8883097922657862790651,9044616688346739322159,9791570559169378  
166423,10022413087086927356987,10188256971222665177027,10428451634591372411  
063,10556330562351990315043,10807074756232085096873,11092899557954756777713  
,11219748183226937444081,11289690157300791142111,11356388858618765252243,11  
555851811303953212259,11840406750339854124653,12119551899660243612857,12432  
693932764984735333,13039166807534008380959,13780490424727643217919,17180935  
187633793305909,17556885629376327076279,17585986704827517313121,17970800418  
281073490651,18759927042952435141463,18878748848023683924413,19038333586296  
906095737,19202204301332453258747,19454927319038632706147,19487174456700762  
428053,19838339043479253822383,19913589652689838192343,19967032785628462490  
651,20403948163869785521081,20437768332637384985519,20788027263812157859459  
,20884984269894220543189,21166009870104651271831,21278118279854880638071,21  
665012067435212794939,21802077374242019218457,22316075269116094327733,23454  
227153359208166083,24007175534184965529527,24072972899627957654539,24598335  
794986486613209,24644777481566864012129,25178257267559841896821,31233353050  
604717749739,32148238864619339782937,51534775553466102497389,57106102640327  
302767377,59891766183757902902371,77006246582692837154477,80762648855019317  
015671,86905507114147634100763,88807159348592877735353,89493746028534918855  
203,94892446498817657366041,96300697072433864814359,98407933332224540193229  
,100998292051576980171157,103208320324040371422167,105151089363554701405613  
,107063020799267216627417,110280410795923223425399,118637401426215023830381  
,124424591739688927431863,143461672486675906952191,146767047495926058896243  
,147663944615454933579253,154227087402532263586913,187147950606785090153029

,191593270098632716997519,241926141425870440875097,247219930078515308290307  
,249012629849678614928851,254461483894529350485281,264160053766978884018979  
,271897816838051704265857,298040301143906035476323,306770482725096411827009  
,334691978056117733842139,353706658032368794387513,370960641351020930699099  
,380545432141656836035231,389517033685271535509539,399108623953444974378413  
,408517864596748195778297,411064494470050220504407,442255502218682268905809  
,452681958066666919646221,596472113360858077620271,609524019561314490697301  
,625568314012607252138333,639256898564305441463023,651290119402775012543797  
,683060369129739647302031,693197320932889117234369,708365752463149272972539  
,734822319085696056236789,756904733359981771334683,770667310260608058980047  
,853982695153646768058971,956004378307089124673873,978542791941048003841037  
,1059356202988936597611589,1084331201880620761013041,1111032115329860334080  
447,1137225406850407139599043,1747929018820152585856739,1789137561503535358  
018391,1833193849006501492483897,1876412564503707814507093,2031376967818015  
167347021,2079267976882487037697049,2947614618453172441832213,3012113844239  
893939465303,3017106515155408334370497,3083126351373250967507707,3091400697  
402107682897199,3159046226885742424317269,3164282442723964838486131,3218511  
366757402731891191,3233522758757311990312961,3294389827270347393546779,3375  
511921233373596861493,3425606178202335540507707,3455091770064022876158817,3  
500564737900417281000217,3506367031126555631835983,35830927867310754487251  
73,3631306411792420316742967,3716916779064540245624923,37404321289342788505  
76249,3808443309928635941949941,3828615204665538862770581,38982297926774446  
47850529,4220166911002001989728313,4319660040534465690861397,43911387545969  
68691298637,4494662654508881509168153,4549778472373707825783533,47810397094  
78500171194303,4835711466970810038398911,4865856457796640982249841,49805721  
30672003834483629,5103215309396477127725443,5223526868753564997141367,53584  
91085021708420928523,5619880894047157612193329,5801586468810337794743899,59  
39391373057614226923089,7404983065870164914846779,756701770626119696987624  
9,7579560269780659961955151,7745414980279142674470581,808552855551249954597  
0553,8205521775693966527262647,8276150053874287354519957,838507367450565069  
6349357,8398972190838028606490843,8582757140309320260899833,860579113060586  
7333470581,8794101658627877559585911,8808678151366712928758689,895963975070  
3040037426829,9001428220324409054114459,9122550254015104698159161,917086897  
8617453555008601,9337620201064576714618709,9396695348298310283154967,961822  
8440989036655252923,10108771903097818719581773,10347092655233720143226137,1  
0375451319739649749106309,10601882727639175730293079,108518288823182918575

29851,13461575164810633350137509,22211488263543890176374659,246127302379810  
67492739487,25813351225199656150921901,37456273566197630297428853,382758856  
79243530303937143,40898644440990410324763671,41505600438218995734988729,424  
13819266188776823281699,43530263874229678453768667,44482786059661400082953  
977,45320119515692076305819203,46144161964484170366416727,47530857053042909  
296346969,51132720014698675270894211,53626999039805927723132953,61831980841  
757315896394321,80660766711524373855955499,104270166954550160017166807,1065  
51789863840097873122317,113852983173567899012179949,1284553697930235012902  
95213,2500483768057255589534620469,

Primary headache associated with sexual activity:

613582,3829598,167814677,1047395053,

Primary stabbing:

14937586453,15465416363,16204378237,16415510201,16521076183,16732208147,1863  
2395823,19371357697,

Nummular:

331231589,

Hypnic headache:

14155130507,14655311797,15355565603,15555638119,15655674377,15855746893,1765  
6399537,18356653343,

Primary cough:

1412526109,1440706181,

Infrequent tension type headache:

1378253359942681,1386197183342927,2206388426002661,2219105362175587,2241879  
928833803,2254801426982701,9699783080351321,9755689611073807,98558117626089  
83,9912617594093761,15777758744434123,15868696835180141,514088503258620013,5  
17051549386911771,522358023418276099,525368732486969333,836221213455008519,  
841040932264547473,3676217787453150659,3697406362596972853,1948395427350169  
84927,195962537217639561209,

Frequent tension type headache:

21262771073163,21385323067821,34038685022703,34234873409001,34586224191969,3  
4785568423623,149641766231883,150504254798061,152048872391109,1529252347680  
03,243408709879329,244811641924743,7931013610289799,7976725504297233,8058590  
236728777,8105037442704159,12900661623604437,12975017022011379,567142294018  
83657,57041112568465119,3005854158299833821,3023178966128651307,

Chronic tension type headache:

5029577936481697,5058566858305799,8051641932650957,8098049090764219,8181158  
961058211,8228312615012437,9281386088971379,9334881109657093,14858184597366  
199,14943822548936033,15097190247725977,15184205753476559,35396840949201377,  
35600857323548359,35966227130689871,36173525269771657,57576835707070051,579  
08690667917717,65319943607289139,65696427432115013,66370666560757597,667532  
06425661099,106250037026448857,106862429170693519,1876032570307672981,18868  
45438148063027,1906210037926563163,1917196839297897821,3051572292474712703,  
3069160605399639001,3461957011186324367,3481910653902095689,351764532772015  
2641,3537919940560038247,5631251962401789421,5663708746046756507,1341540271  
9747321883,13492724925624828061,24756258627162583681,24898945996771589927,7  
11016344146608059799,715114421058115887233,1312081707239616935093,131964413  
7828894266131,

Table 3, a list of logically contradicting phenotypes:

1 minute to 72 hours with severe,constant,  
1 minute to 72 hours with severe,unremitting within 24 hours,  
1 minute to 72 hours with severe,up to 72 hours with mild,  
1 minute to 72 hours with severe,up to few seconds,  
1 to 14 days per month,constant,  
1 to 14 days per month,every other day to 8 per day,  
1 to 14 days per month,greater than 1 per day,  
1 to 14 days per month,greater than 15 days per month,  
1 to 14 days per month,greater than 5 per day,  
1 to 14 days per month,less than 12 days per year,  
1 to 14 days per month,more than 1 episode per day,  
1 to 14 days per month,unremitting within 24 hours,  
1 to 600 seconds,15 minutes up to four hours after waking,  
1 to 600 seconds,15 to 180 minutes,  
1 to 600 seconds,30 min to 7 days in duration,  
1 to 600 seconds,4 to 72 hours,  
1 to 600 seconds,greater than 5 minutes,  
1 to 600 seconds,constant,  
1 to 600 seconds,hours to days,  
1 to 600 seconds,unremitting within 24 hours,  
15 minutes up to four hours after waking,4 to 72 hours,  
15 minutes up to four hours after waking,constant,  
15 minutes up to four hours after waking,unremitting within 24 hours,  
15 minutes up to four hours after waking,up to few seconds,  
15 to 180 minutes,4 to 72 hours,  
15 to 180 minutes,constant,  
15 to 180 minutes,unremitting within 24 hours,  
15 to 180 minutes,up to few seconds,  
2 to 30 minutes,4 to 72 hours,  
2 to 30 minutes,constant,  
2 to 30 minutes,hours to days,  
2 to 30 minutes,unremitting within 24 hours,  
2 to 30 minutes,up to few seconds,  
30 min to 7 days in duration,constant,

30 min to 7 days in duration,unremitting within 24 hours,  
30 min to 7 days in duration,up to few seconds,  
4 to 72 hours,between 1 second to 2 hours,  
4 to 72 hours,constant,  
4 to 72 hours,unremitting within 24 hours,  
4 to 72 hours,up to few seconds,  
abrupt explosive intensity just before or with orgasm,increasing in intensity with increasing sexual excitement,  
aggravated by physical activity,restless,  
aggravated by physical activity,not aggravated by activity,  
between 1 second to 2 hours,constant,  
between 1 second to 2 hours,unremitting within 24 hours,  
bilateral location,unilateral,  
brought on by Primary exercise headache,restless,  
conjunctival injection,no conjunctival injection,  
constant,developing only during sleep and causing waking,  
constant,each individual aura symptom lasts 5–60 minutes,  
constant,every other day to 8 per day,  
constant,fully reversible,  
constant,hours to days,  
constant,irregular frequency,  
constant,less than 12 days per year,  
constant,less than 48 hours,  
constant,resolve within 1 hour after removal of compression,  
constant,resolve within 1 hour after removal of traction,  
constant,resolve within 30 min after removal of cold,  
constant,up to 72 hours with mild,  
constant,up to few seconds,  
every other day to 8 per day,unremitting within 24 hours,  
every other day to 8 per day,constant,  
eyelid edema,no eyelid edema,  
forehead and facial sweating,no forehead and facial sweating,  
fully reversible,unremitting within 24 hours,  
greater than 15 days per month,less than 12 days per year,  
greater than 8 days per month,less than 12 days per year,  
hours to days,resolve within 1 hour after removal of compression,

hours to days,resolve within 1 hour after removal of traction,  
hours to days,resolve within 30 min after removal of cold,  
hours to days,unremitting within 24 hours,  
hours to days,up to few seconds,  
hours to days,constant,  
irregular frequency,unremitting within 24 hours,  
irregular frequency,constant,  
lacrimation,no lacrimation,  
less than 12 days per year,more than 10 days per month,  
less than 12 days per year,unremitting within 24 hours,  
less than 12 days per year,constant,  
less than 48 hours,unremitting within 24 hours,  
less than 48 hours,constant,  
mild to moderate pain,severe,  
miosis,no miosis,  
moderate to severe,up to 72 hours with mild,  
more than 1 episode per day,unremitting within 24 hours,  
more than 1 episode per day,constant,  
nasal congestion,no nasal congestion,  
nausea/vomiting,no nausea/vomiting,  
no orbital or supraorbital or temporal pain,orbital or supraorbital or temporal pain,  
no phonophobia,phonophobia,  
no photophobia,photophobia,  
no ptosis,ptosis,  
no restless,restless,  
no rhinorrhea,rhinorrhea,  
nonpulsating,pulsating,  
severe,up to 72 hours with mild,  
unremitting within 24 hours,up to 72 hours with mild,  
unremitting within 24 hours,up to few seconds,

Table 4, Logically possible dual-diagnoses, classified:

Intersecting phenotypes:

1. Dual diagnoses with intersecting phenotypes with subset relationships:

Migraine without Aura, Chronic migraine,  
Migraine with aura, Chronic migraine,

2. Dual diagnoses with intersecting phenotypes without subset relationships:

Migraine without Aura, Migraine with aura,  
Cluster headache, chronic tension type headache,  
Cluster headache, infrequent tension type headache,  
Hemicrania continua, chronic tension type headache,  
Hemicrania continua, Nummular headache,  
New Daily Persistent Headache, chronic tension type headache,  
paroxysmal hemicrania, infrequent tension type headache,  
paroxysmal hemicrania, Short lasting unilateral neuralgiform headaches,  
Short lasting unilateral neuralgiform headaches, Primary headache associated with sexual activity,  
Short lasting unilateral neuralgiform headaches, Primary stabbing headache,  
New Daily Persistent Headache, Hemicrania continua,  
New Daily Persistent Headache, Nummular headache,  
New Daily Persistent Headache, Primary thunderclap headache,  
Chronic Tension Type Headaches, Chronic Migraine

Non-intersecting phenotypes:

Migraine without Aura, Cold stimulus headache,  
Migraine without Aura, External compression headache,  
Migraine without Aura, Primary exercise headache,  
Migraine without Aura, Nummular headache,  
Migraine without Aura, Primary headache associated with sexual activity,  
Migraine without Aura, Primary thunderclap headache,  
Migraine without Aura, External traction headache,  
Cluster Headache, Chronic Migraine

Cluster headache,Primary Cough Headaches  
Cluster headache,Hypnic headache,  
Cluster headache,Migraine with aura,  
Cluster headache,Migraine with aura,Chronic migraine,  
Cluster headache,Nummular headache,  
Cluster headache,paroxysmal hemicrania,  
Cluster headache,Primary headache associated with sexual activity,  
Cold stimulus headache,Cluster headache,  
Cold stimulus headache,External compression headache,  
Cold stimulus headache,frequent tension type headache,  
Cold stimulus headache,Hypnic headache,  
Cold stimulus headache,infrequent tension type headache,  
Cold stimulus headache,Migraine with aura,  
Cold stimulus headache,Nummular headache,  
Cold stimulus headache,paroxysmal hemicrania,  
Cold stimulus headache,Primary headache associated with sexual activity,  
Cold stimulus headache,Primary stabbing headache,  
Cold stimulus headache,Short lasting unilateral neuralgiform headaches,  
Cold stimulus headache,External traction headache,  
External compression headache,Cluster headache,  
External compression headache,frequent tension type headache,  
External compression headache,Hypnic headache,  
External compression headache,infrequent tension type headache,  
External compression headache,Migraine with aura,  
External compression headache,Nummular headache,  
External compression headache,paroxysmal hemicrania,  
External compression headache,Primary headache associated with sexual activity,  
External compression headache,Primary stabbing headache,  
External compression headache,Short lasting unilateral neuralgiform headaches,  
External compression headache,External traction headache,  
Primary exercise headache,chronic tension type headache,  
Primary exercise headache,Cluster headache,  
Primary exercise headache,Cold stimulus headache,  
Primary exercise headache,External compression headache,  
Primary exercise headache,frequent tension type headache,  
Primary exercise headache,Hypnic headache,

Primary exercise headache,infrequent tension type headache,  
Primary exercise headache,Migraine with aura,  
Primary exercise headache,Nummular headache,  
Primary exercise headache,paroxysmal hemicrania,  
Primary exercise headache,Primary headache associated with sexual activity,  
Primary exercise headache,Primary stabbing headache,  
Primary exercise headache,Short lasting unilateral neuralgiform headaches,  
Primary exercise headache,Primary thunderclap headache,  
Primary exercise headache,External traction headache,  
Hypnic headache,chronic tension type headache,  
Hypnic headache,frequent tension type headache,  
Migraine with aura,chronic tension type headache,  
Migraine with aura,frequent tension type headache,  
Migraine with aura,Hypnic headache,  
Migraine with aura,infrequent tension type headache,  
Migraine with aura,Nummular headache,  
Migraine with aura,Primary headache associated with sexual activity,  
Migraine with aura,Primary stabbing headache,  
Nummular headache,chronic tension type headache,  
Nummular headache,frequent tension type headache,  
Nummular headache,Hypnic headache,  
Nummular headache,infrequent tension type headache,  
paroxysmal hemicrania,Hypnic headache,  
paroxysmal hemicrania,Migraine with aura,  
paroxysmal hemicrania,Nummular headache,  
paroxysmal hemicrania,Primary headache associated with sexual activity,  
Primary headache associated with sexual activity,chronic tension type headache,  
Primary headache associated with sexual activity,frequent tension type headache,  
Primary headache associated with sexual activity,Hypnic headache,  
Primary headache associated with sexual activity,infrequent tension type headache,  
Primary headache associated with sexual activity,Nummular headache,  
Primary headache associated with sexual activity,Primary stabbing headache,  
Primary stabbing headache,Nummular headache,  
Short lasting unilateral neuralgiform headaches,Migraine with aura,  
Short lasting unilateral neuralgiform headaches,Nummular headache,  
Primary thunderclap headache,chronic tension type headache,

Primary thunderclap headache,Cluster headache,  
Primary thunderclap headache,Cold stimulus headache,  
Primary thunderclap headache,External compression headache,  
Primary thunderclap headache,frequent tension type headache,  
Primary thunderclap headache,Hemicrania continua,  
Primary thunderclap headache,Hypnic headache,  
Primary thunderclap headache,infrequent tension type headache,  
Primary thunderclap headache,Migraine with aura,  
Primary thunderclap headache,Nummular headache,  
Primary thunderclap headache,paroxysmal hemicrania,  
Primary thunderclap headache,Primary headache associated with sexual activity,  
Primary thunderclap headache,Primary stabbing headache,  
Primary thunderclap headache,External traction headache,  
External traction headache,Cluster headache,  
External traction headache,frequent tension type headache,  
External traction headache,Hypnic headache,  
External traction headache,infrequent tension type headache,  
External traction headache,Migraine with aura,  
External traction headache,Nummular headache,  
External traction headache,paroxysmal hemicrania,  
External traction headache,Primary headache associated with sexual activity,  
External traction headache,Primary stabbing headache,  
External traction headache,Short lasting unilateral neuralgiform headaches,  
Chronic migraine,Cold stimulus headache  
Chronic migraine,External compression headache  
Chronic migraine,Primary cough headache  
Chronic migraine,Primary exercise headache  
Chronic migraine,Hypnic headache  
Chronic migraine,Nummular headache  
Chronic migraine,paroxysmal hemicranias  
Chronic migraine,Primary headache associated with sexual activity,  
Chronic migraine,Primary stabbing headache,  
Chronic migraine,Short lasting unilateral neuralgiform headaches,  
Chronic migraine,Primary thunderclap headache,  
Chronic migraine,External traction headache,  
Cold stimulus headache,Primary cough headache

Primary cough headache, External compression headache  
Primary cough headache, Primary exercise headache  
Primary cough headache, frequent tension type headache,  
Primary cough headache, Hypnic headache  
Primary cough headache, infrequent tension type headache,  
Primary cough headache, Migraine with aura,  
Primary cough headache, Nummular headache  
Primary cough headache, paroxysmal hemicranias  
Primary cough headache, Primary headache associated with sexual activity,  
Primary cough headache, Primary stabbing headache,  
Primary cough headache, Short lasting unilateral neuralgiform headaches,  
Primary cough headache, Primary thunderclap headache,  
Primary cough headache, External traction headache,
